# Supplementary material
Source: ML conference proceedings conference paper supplement (https://proceedings.neurips.cc/paper_files/paper/2006/hash/62f91ce9b820a491ee78c108636db089-Abstract.html)
Supplement: Supplementary file [file 62f91ce9b820a491ee78c108636db089-Supplemental.zip]

---

# Correction:

## Adaptor Grammars: A Framework for Specifying Compositional Nonparametric Bayesian Models

---

**Mark Johnson**  
Microsoft Research / Brown University  
Mark\_Johnson@Brown.edu

**Thomas L. Griffiths**  
University of California, Berkeley  
Tom\_Griffiths@Berkeley.edu

**Sharon Goldwater**  
Stanford University  
sgwater@gmail.com

There is an error in equation (4). The correct equation is:

$$\begin{aligned} G_A &= \sum_{A \rightarrow B_1 \dots B_n \in R_A} \theta_{A \rightarrow B_1 \dots B_n} \text{TREEDIST}_A(H_{B_1}, \dots, H_{B_n}) \\ H_A &\sim C_A(G_A) \end{aligned} \tag{4}$$

(Thanks to Julia Hockenmaier for pointing this out).
